# Supplementary material for: Endoplasmic reticulum mediates mitochondrial transfer within the osteocyte dendritic network
Source: PubMed Central journal article supplement — Sci Adv. 2019 Nov 20;5(11):eaaw7215. doi: 10.1126/sciadv.aaw7215 (PMC6867880; doi:10.1126/sciadv.aaw7215), 2019-11-20
Supplement: aaw7215_SM.pdf [file aaw7215_SM.pdf]

## Supplementary Materials for

### Endoplasmic reticulum mediates mitochondrial transfer within the osteocyte dendritic network

Junjie Gao, An Qin, Delin Liu, Rui Ruan, Qiyang Wang, Jun Yuan, Tak Sum Cheng, Aleksandra Filipovska, J. M. Papadimitriou, Kerong Dai, Qing Jiang, Xiang Gao, Jian Q. Feng, Hiroshi Takayanagi\*, Changqing Zhang\*, Ming H. Zheng\*

\*Corresponding author. Email: minghao.zheng@uwa.edu.au (M.H.Z.); zhangcq@sjtu.edu.cn (C.Z.); takayana@m.u-tokyo.ac.jp (H.T.)

Published 20 November 2019, *Sci. Adv.* **5**, eaaw7215 (2019)  
DOI: 10.1126/sciadv.aaw7215

#### The PDF file includes:

Fig. S1. No mitochondrial transfer from conditioned medium to MLO-Y4 cells.  
Fig. S2. Osteocytes do not pass through the pores of the transwell membrane.  
Fig. S3. Depleted mtDNA and impeded ATP production in MLO-Y4  $\rho^0$  cells.  
Fig. S4. Parental MLO-Y4 cells and primary osteocytes can transfer mitochondria to MLO-Y4  $\rho^0$  cells.  
Fig. S5. Mitochondrial distribution and ER movement in osteocyte dendrites.  
Fig. S6. Knockdown of Mfn2 has no effect on ATP production and the level of mtDNA.  
Fig. S7. Mfn2 knockdown impedes mitochondrial transfer in MLO-Y4 cells.  
Fig. S8. VAPB knockdown impedes mitochondrial transfer in MLO-Y4 cells.  
Fig. S9. Hypothetical model of ER-mediated mitochondrial transfer.  
Table S1. Primer sequences for qPCR.

#### Other Supplementary Material for this manuscript includes the following:

(available at [advances.sciencemag.org/cgi/content/full/5/11/eaaw7215/DC1](https://advances.sciencemag.org/cgi/content/full/5/11/eaaw7215/DC1))

Movie S1 (.mp4 format). pTaqYFP-mito-labeled mitochondria (green) in the dendrite dynamically migrate toward the PKH26-stained cells (magenta).  
Movie S2 (.mp4 format). pTaqYFP-mito-labeled mitochondria (green) dynamically move from the cytoplasm to the dendritic process and are associated with RFP-labeled ER (magenta).  
Movie S3 (.mp4 format). Transfer of MTR-labeled mitochondria (magenta) within dendrites is dynamically colocalized with GFP-labeled ER (green).  
Movie S4 (.mp4 format). Transfer of MTR-labeled mitochondria (magenta) is dynamically colocalized with YFP-labeled Mfn2 (green) within dendrites.

**Supplementary Figure 1.**

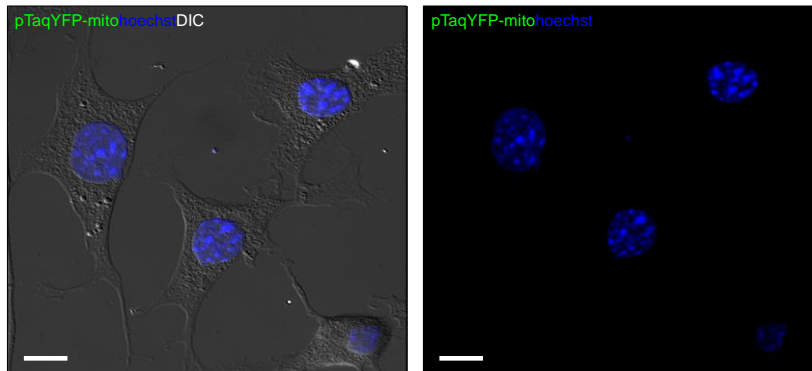

**Fig. S1. No mitochondrial transfer from conditioned medium to MLO-Y4 cells.**

Recipient cells were co-cultured with conditioned medium isolated from MLO-Y4 cells expressing pTaqYFP-mito. No pTaqYFP-mito-labeled mitochondria were present in recipient cells. Scale bar = 10  $\mu$ m.

**Supplementary Figure 2.**

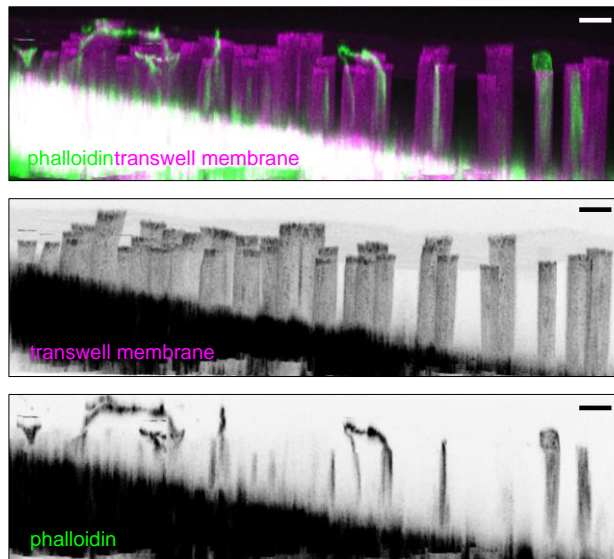

**Fig. S2. Osteocytes do not pass through the pores of the transwell membrane.** 3D confocal images demonstrate no osteocytes in the pores of the transwell membrane co-culture system. Scale bar = 10  $\mu\text{m}$ .

**Supplementary Figure 3.**

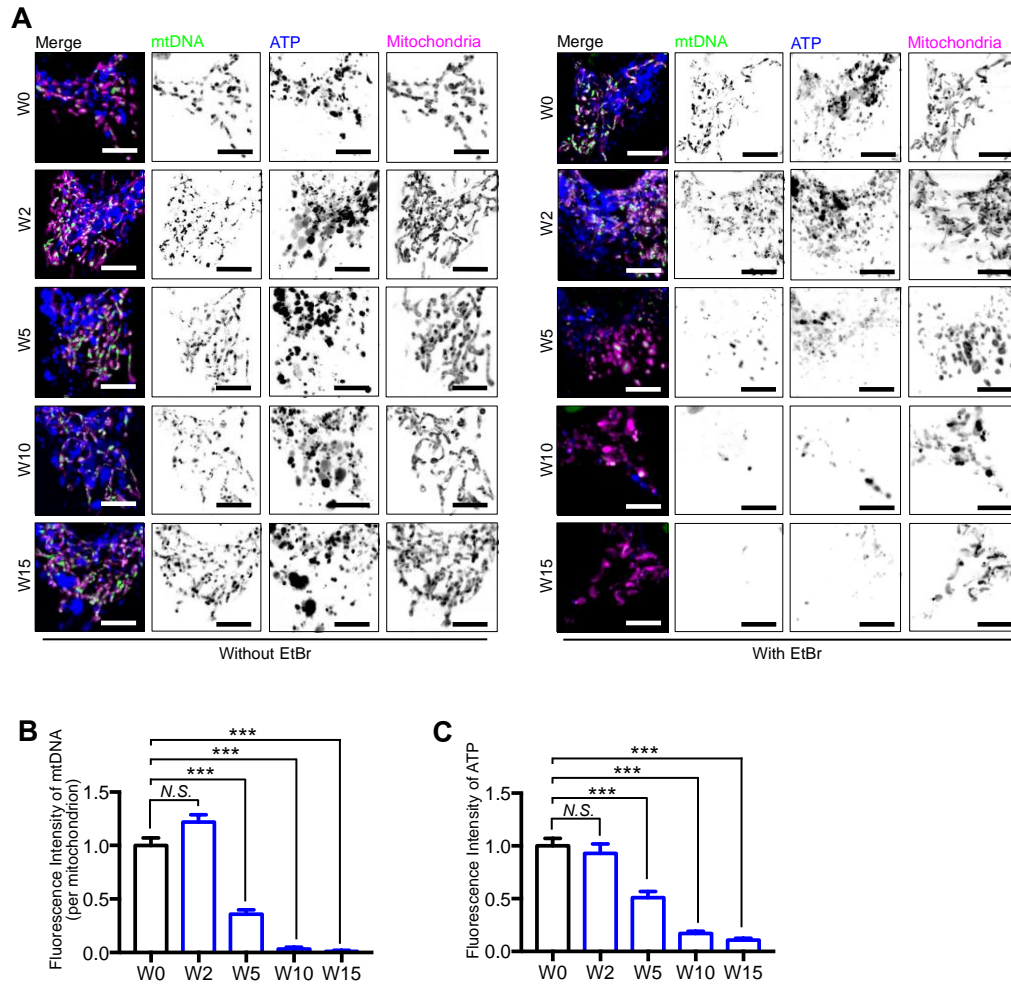

**Fig. S3. Depleted mtDNA and impeded ATP production in MLO-Y4  $\rho^0$  cells. (A)** Confocal images of MLO-Y4 cells cultured with/without EtBr for up to 15 weeks (W15). **(B)** Quantitation of mtDNA. Kruskal-Wallis test with Dunn's post hoc. Data presented as mean  $\pm$  SEM. **(C)** Quantitative analysis of ATP production. Kruskal-Wallis test with Dunn's post hoc. Data presented as mean  $\pm$  SEM. Scale bar = 5  $\mu$ m.

**Supplementary Figure 4.**

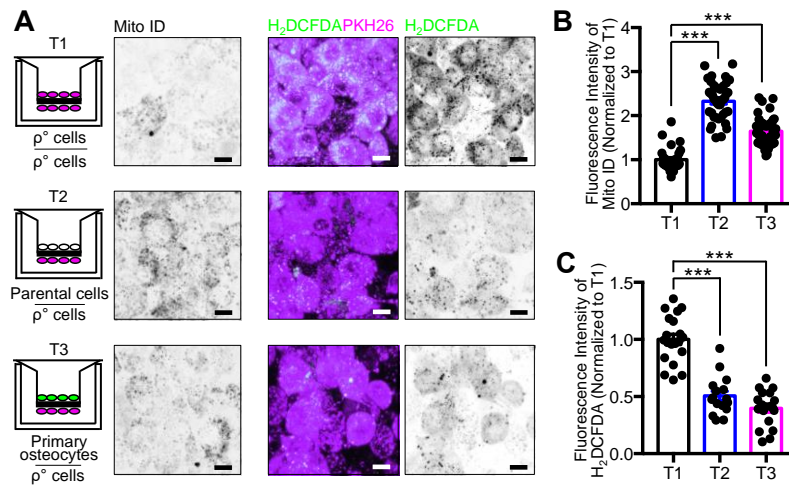

**Fig. S4. Parental MLO-Y4 cells and primary osteocytes can transfer**

**mitochondria to MLO-Y4 ρ° cells.** (A) T1: MLO-Y4 ρ° cells (ρ° cells) co-cultured with ρ° cells in the transwell culture system; T2: ρ° cells co-cultured with healthy MLO-Y4 cells (parental cells); T3: ρ° cells co-cultured with primary osteocytes.

Quantitative analysis of 3D confocal images show that healthy osteocytes (B) restore the fluorescence signal of an oxygen sensor (labeled by Mito ID) and (C) attenuate the accumulation of ROS (labeled by H<sub>2</sub>DCFDA) in ρ° cells. Kruskal-Wallis test with Dunn's post hoc. Data presented as mean ± SEM. Scale bar = 10 μm.

**Supplementary Figure 5.**

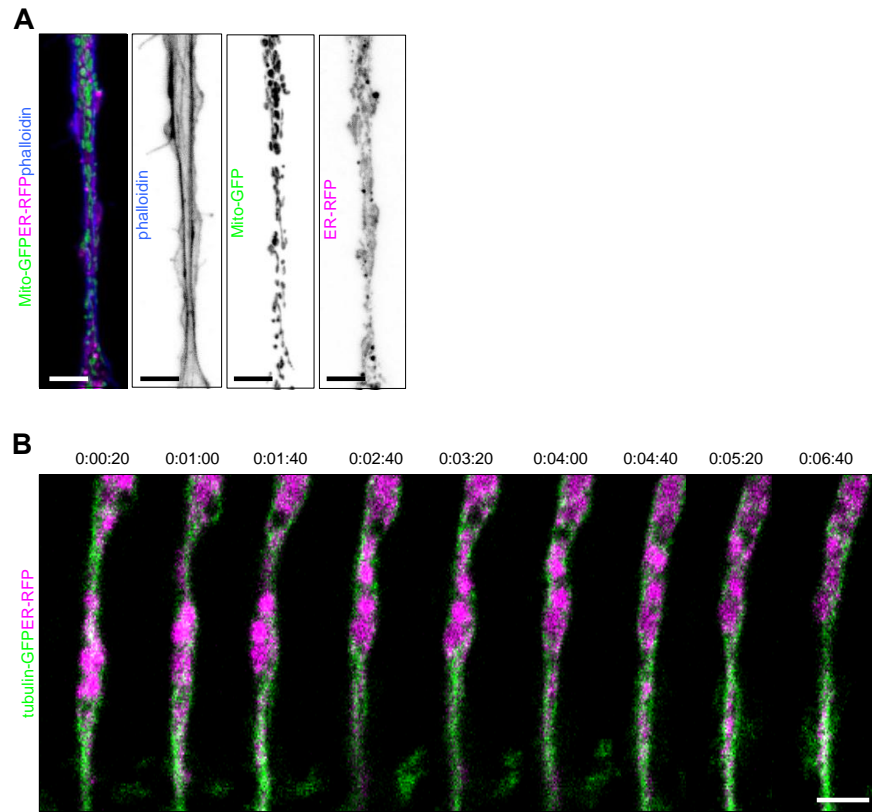

**Fig. S5. Mitochondrial distribution and ER movement in osteocyte dendrites. (A)**

GFP-labeled mitochondria are co-localized with RFP-labeled ER within the

phalloidin-labeled dendrite. **(B)** RFP-labeled ER dynamically moves along with GFP-

labeled tubulin in the MLO-Y4 cell dendrite. Scale bar = 2  $\mu$ m.

### Supplementary Figure 6.

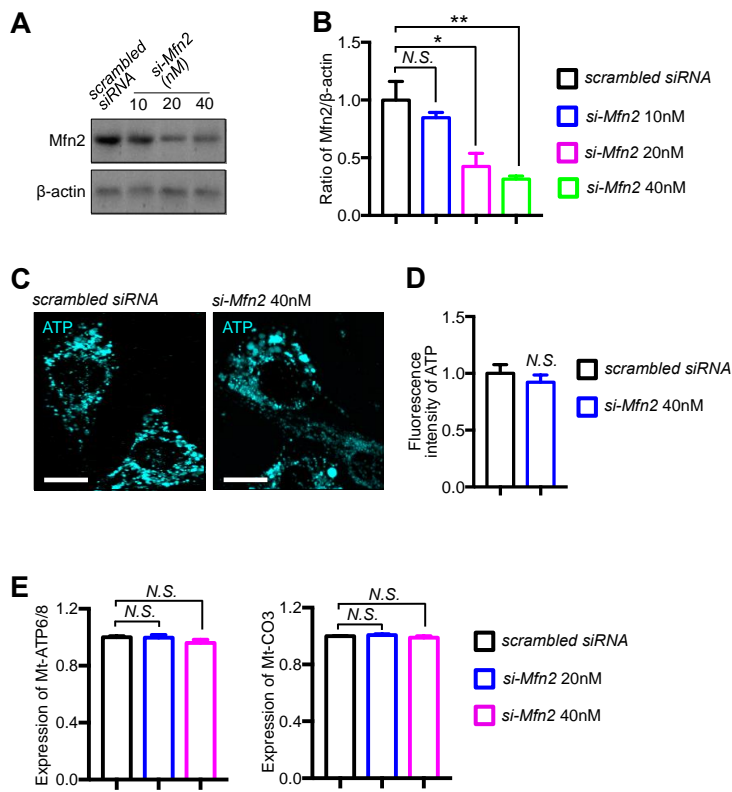

**Fig. S6. Knockdown of Mfn2 has no effect on ATP production and the level of mtDNA.** (A and B) Immunoblotting and quantitative analysis of Mfn2 expression in MLO-Y4 cells. One-way ANOVA with Dunnett's multiple comparisons test. Data presented as mean  $\pm$  SEM. (C and D) Confocal images and quantitative analysis of images show that Mfn2 knockdown does not alter the ATP production in MLO-Y4 cells. Two-tailed Student's t test. Data presented as mean  $\pm$  SEM. (E) qPCR results show that knockdown of Mfn2 has no significant effects on the expression of mitochondrial genes Mt-ATP6/8 and Mt-CO3. One-way ANOVA with Dunnett's multiple comparisons test. Data presented as mean  $\pm$  SEM. Scale bar = 10  $\mu$ m.

Supplementary Figure 7.

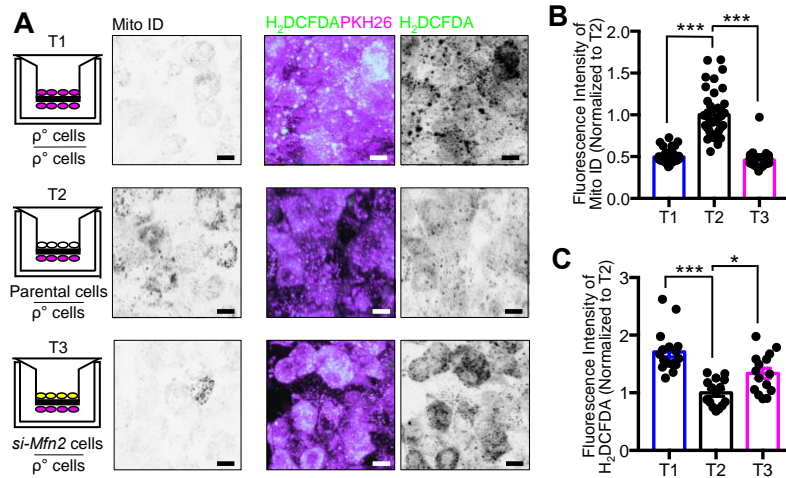

**Fig. S7. Mfn2 knockdown impedes mitochondrial transfer in MLO-Y4 cells. (A)**

T1: MLO-Y4  $\rho^{\circ}$  cells ( $\rho^{\circ}$  cells) co-cultured with  $\rho^{\circ}$  cells; T2:  $\rho^{\circ}$  cells co-cultured with healthy MLO-Y4 cells (parental cells); T3:  $\rho^{\circ}$  cells co-cultured with Mfn2 knockdown MLO-Y4 cells (*si-Mfn2* cells). Quantitative analyses of 3D confocal images show that parental MLO-Y4 cells, but not cells lacking Mfn2 (**B**) restore the fluorescence signal of an oxygen sensor (labeled by Mito ID) and (**C**) attenuate the accumulation of ROS (labeled by  $H_2DCFDA$ ) in  $\rho^{\circ}$  cells, Kruskal-Wallis test with Dunn's post hoc. Data presented as mean  $\pm$  SEM. Scale bar = 10  $\mu$ m.



**Supplementary Figure 8.**

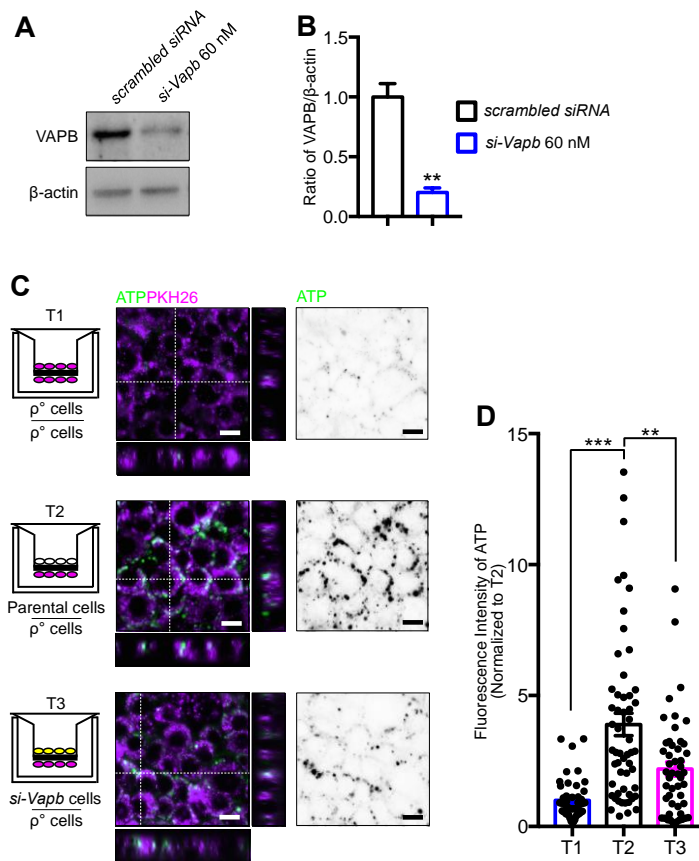

**Fig. S8. VAPB knockdown impedes mitochondrial transfer in MLO-Y4 cells. (A and B)** Immunoblotting and quantitative analysis demonstrate knockdown of VAPB in MLO-Y4 cells. Two-tailed Student's t test. Data presented as mean  $\pm$  SEM. **(C)** T1: MLO-Y4  $\rho^\circ$  cells ( $\rho^\circ$  cells) co-cultured with  $\rho^\circ$  cells; T2:  $\rho^\circ$  cells co-cultured with healthy MLO-Y4 cells (parental cells); T3:  $\rho^\circ$  cells co-cultured with VAPB knockdown MLO-Y4 cells (*si-Vapb* cells). **(D)** Quantitative analysis of 3D confocal images shows healthy cells rescue the ATP production (labeled by Alexa Fluor 647) in  $\rho^\circ$  cells, which rely on the expression of VAPB. Kruskal-Wallis test with Dunn's post hoc. Data presented as mean  $\pm$  SEM. Scale bar = 10  $\mu$ m.

**Supplementary Figure 9.**

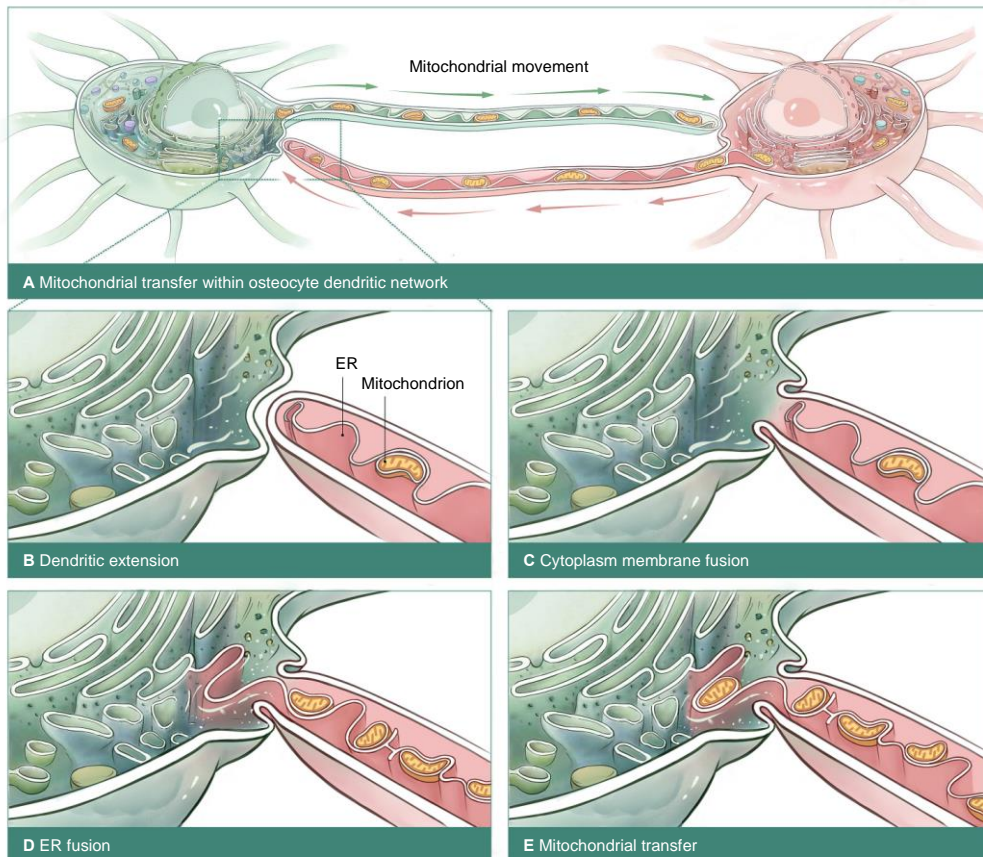

**Fig. S9. Hypothetical model of ER-mediated mitochondrial transfer. (A)**

Mitochondria are shared within the osteocyte dendritic network through mitochondrial transfer. **(B and C)** The dendrite from donor osteocyte extends and fuses with the cytoplasm membrane of the recipient osteocyte. **(D)** ER from the donor osteocyte makes contact with the ER in the recipient osteocyte. **(E)** Mitochondria apposed by the ER in the dendrite of donor osteocyte transfer into the recipient osteocyte. The mitochondrial transfer process is associated with ER-tethering proteins such as Mfn2.

**Table S1. Primer sequences for qPCR.**

| <b>Gene</b>                     | <b>Species</b>      | <b>Primer sequence</b>             |
|---------------------------------|---------------------|------------------------------------|
| <i>Mt-ATP6/8</i>                | <i>Mus musculus</i> | F 5' - CAAACATTCCCCTGGCACC - 3'    |
|                                 |                     | R 5' - TTGTTGGGGTAATGAATGAGGC - 3' |
| <i>Mt-CO3</i>                   | <i>Mus musculus</i> | F 5' -TCCAAGTCCATGACCATTAAGT - 3'  |
|                                 |                     | R 5' -TATTGGTGAGTAGGCCAAGGG - 3'   |
| <i><math>\beta</math>-Actin</i> | <i>Mus musculus</i> | F 5' -GTGACGTTGACATCCGTAAAGA - 3'  |
|                                 |                     | R 5' -GCCGGACTCATCGTACTCC - 3'     |

(F: forward primer and R: reverse primer)!
